# Supplementary material
Source: PubMed Central journal article supplement (PMC10562992)
Supplement: jamaneurol-e233530-s002.pdf [file jamaneurol-e233530-s002.pdf]

## Data Sharing Statement

Taddei. Tau Oligomer–Containing Synapses Engulfed by Microglia and Astrocytes in Alzheimer Disease. *JAMA Neurol.* Published October 09, 2023.  
doi:10.1001/jamaneurol.2023.3530

### Data

**Data available:** No
